# Supplementary material for: Olfactory imagery as a retrieval method for autobiographical memories
Source: Springer Nature journal article supplement (doi:10.1007/s00426-022-01701-y), 2022-07-05
Supplement: MOESM1 [file 23242614]

Supplementary Table 1. Sample descriptives (number of participants, self-ratings of olfactory performance, and mental well being (BSI\_sum) per condition)

|                                |               | <b>condition</b> | <b>N</b>  |       |                           | <b>Chi2 (df)</b> | <b>p</b> |                           |  |
|--------------------------------|---------------|------------------|-----------|-------|---------------------------|------------------|----------|---------------------------|--|
| <b>number</b>                  | <b>visual</b> | PL               | 36        |       |                           | 1.03(7)          | .994     |                           |  |
|                                |               | PH               | 36        |       |                           |                  |          |                           |  |
|                                |               | UPL              | 34        |       |                           |                  |          |                           |  |
|                                |               | UPH              | 40        |       |                           |                  |          |                           |  |
|                                | <b>odor</b>   | PL               | 35        |       |                           |                  |          |                           |  |
|                                |               | PH               | 36        |       |                           |                  |          |                           |  |
|                                |               | UPL              | 40        |       |                           |                  |          |                           |  |
|                                |               | UPH              | 39        |       |                           |                  |          |                           |  |
|                                |               | <b>M</b>         | <b>SD</b> |       |                           | <b>F(df)</b>     | <b>p</b> | <b>Part.η<sup>2</sup></b> |  |
| <b>Olf. perf (self-rating)</b> | <b>visual</b> | PL               | 4.67      | .93   | Sense category            | .539(1,288)      | .463     | .002                      |  |
|                                |               | PH               | 4.31      | 1.37  | Valence                   | .023(1,288)      | .880     | <.001                     |  |
|                                |               | UPL              | 4.32      | 1.36  | Arousal                   | .169(1,288)      | .681     | .001                      |  |
|                                |               | UPH              | 4.50      | 1.36  | Sense cat x valence       | .126(1,288)      | .723     | <.001                     |  |
|                                | <b>odor</b>   | PL               | 4.49      | 1.12  | Sense cat x arousal       | .047(1,288)      | .828     | <.001                     |  |
|                                |               | PH               | 4.17      | 1.38  | Valence x arousal         | 3.632(1,288)     | .058     | .012                      |  |
|                                |               | UPL              | 4.22      | 1.39  | Sense cat. x val.x arous. | .006(1,288)      | .941     | .000                      |  |
|                                |               | UPH              | 4.49      | 1.07  |                           |                  |          |                           |  |
| <b>BSI_sum</b>                 | <b>visual</b> | PL               | 38.17     | 30.24 | Sense category            | .003(1,286)      | .959     | <.001                     |  |
|                                |               | PH               | 39.31     | 29.19 | Valence                   | .002(1,286)      | .961     | <.001                     |  |
|                                |               | UPL              | 31.97     | 26.40 | Arousal                   | 1.12(1,286)      | .291     | .004                      |  |
|                                |               | UPH              | 41.78     | 28.04 | Sense cat x valence       | .250(1,286)      | .617     | .001                      |  |
|                                | <b>odor</b>   | PL               | 32.06     | 26.82 | Sense cat x arousal       | .306(1,286)      | .581     | .001                      |  |
|                                |               | PH               | 41.67     | 35.87 | Valence x arousal         | .275(1,286)      | .617     | .001                      |  |
|                                |               | UPL              | 41.49     | 29.28 | Sense cat. x val.x arous. | 3.24(1,286)      | .073     | .011                      |  |
|                                |               | UPH              | 35.31     | 25.52 |                           |                  |          |                           |  |

Supplementary Table 2. ANOVA statistics for the manipulation check

|                                      | <i>F(df)</i>    | <i>p</i> | <i>Part.η<sup>2</sup></i> |
|--------------------------------------|-----------------|----------|---------------------------|
| <b>Valence of AM</b>                 |                 |          |                           |
| Sensory category                     | .62 (1, 206)    | .431     | .003                      |
| valence                              | 252.00 (1, 206) | <.001    | .550                      |
| arousal                              | .01 (1, 206)    | .940     | <.001                     |
| Sensory category * valence           | 2.44 (1, 206)   | .119     | .012                      |
| Sensory category * arousal           | <.01 (1, 206)   | .994     | <.001                     |
| valence * arousal                    | .28 (1, 206)    | .600     | .001                      |
| Sensory category * valence * arousal | 1.33 (1, 206)   | .250     | .006                      |
| <b>Arousal of AM</b>                 |                 |          |                           |
| Sensory category                     | 5.45 (1, 217)   | .020     | .025                      |
| valence                              | 25.06 (1, 217)  | <.001    | .104                      |
| arousal                              | .60 (1, 217)    | .440     | .003                      |
| Sensory category * valence           | .20 (1, 217)    | .652     | .001                      |
| Sensory category * arousal           | 3.69 (1, 217)   | .056     | .017                      |
| valence * arousal                    | 3.36 (1, 217)   | .068     | .015                      |
| Sensory category * valence * arousal | 5.76 (1, 217)   | .017     | .026                      |

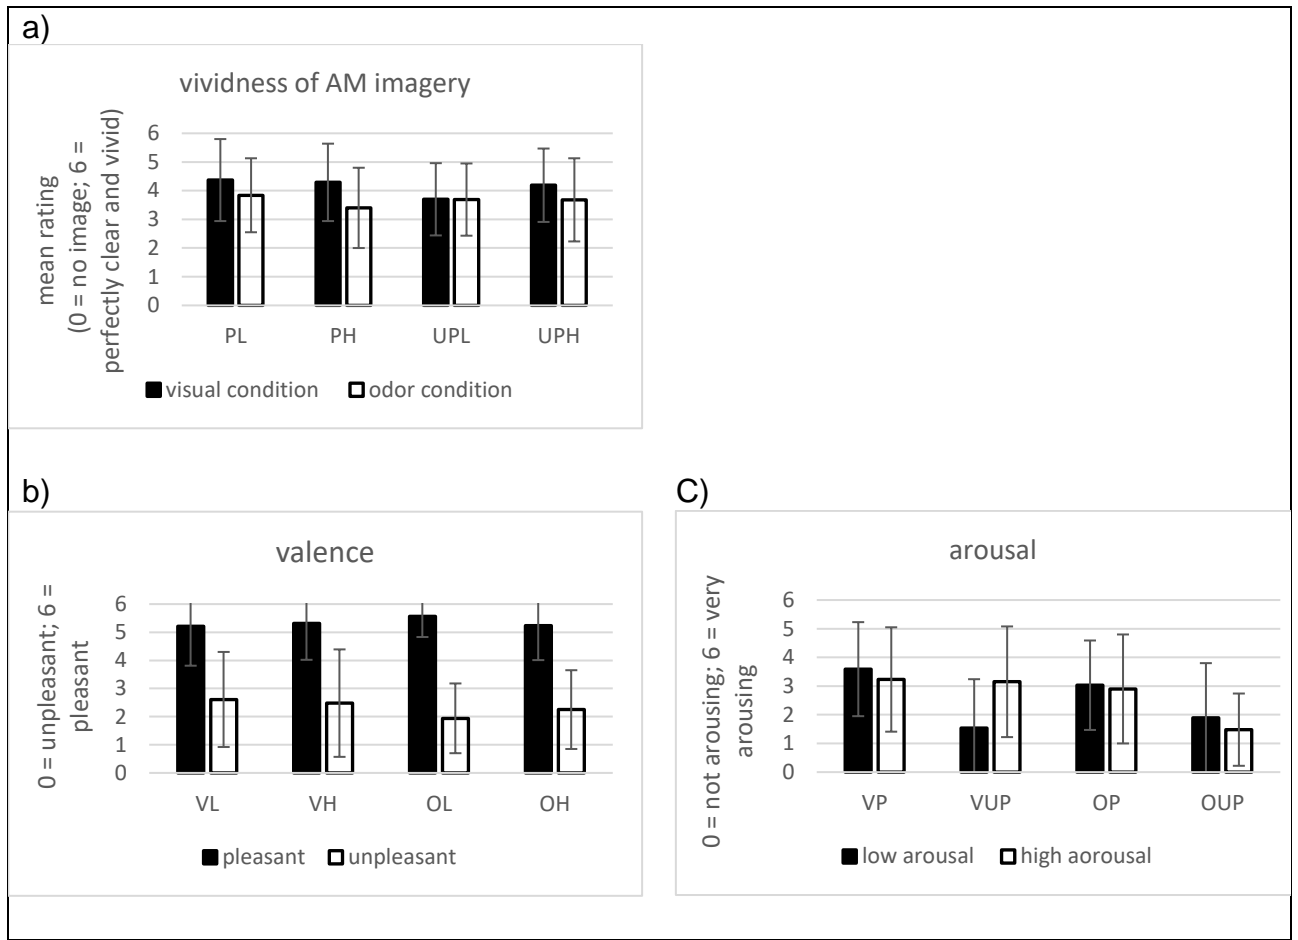

Supplementary Fig 1. Mean ratings of the a) vividness, b) valence and c) arousal of AM imagery

Footnote: AM=autobiographical memory, V=visual imagery condition, O=odor imagery condition, P=pleasant condition, UP=unpleasant condition, L=low arousal condition, H=high arousal condition
